# Supplementary material for: Influence of slope aspect on the microbial properties of rhizospheric and non-rhizospheric soil on the Loess Plateau, China
Source: Copernicus journal article supplement (doi:10.5194/se-2017-137), 2018-01-02
Supplement: Supplementary file [file se-2017-137-AC1-supplement.pdf]

Feb 11, 2018

Solid Earth

Dear Reviewer,

This letter certifies that I have edited the language of the manuscript entitled “Influence of slope aspect on the microbial properties of rhizospheric and non-rhizospheric soil on the Loess Plateau, China”. The language of the manuscript should meet your standards.

Sincerely,

Dr. William Blackhall

Editor, Global Biological Editing

[editor@globalbiologicalediting.com](mailto:editor@globalbiologicalediting.com)

[www.globalbiologicalediting.com](http://www.globalbiologicalediting.com)
